# Supplementary material for: Infection with SARS-CoV-2 Is Associated with Elevated Levels of IP-10, MCP-1, and IL-13 in Sepsis Patients
Source: MDPI journal article supplement (doi:10.3390/diagnostics13061069), 2023-03-11
Supplement: s1 [file s1]

**Supplementary Table S1.** Antibodies and fluorochrome conjugates used for flow cytometric characterization of extracellular vesicles.

| Flow cytometry |        |          |                         |                               |              |                    |
|----------------|--------|----------|-------------------------|-------------------------------|--------------|--------------------|
| Antigen        | Origin | Clone    | Marker for              | Fluorochrome                  | Abbreviation | Supplier           |
| CD41           | mouse  | P2       | platelets               | Phycoerythrin<br>Cyanin 7     | PC7          | Beckman<br>Coulter |
| PF4            | mouse  | # 170138 | platelet<br>factor 4    | Phycoerythrin                 | PE           | R&D Systems        |
| CRP            | goat   | -        | C-reactive protein      | Fluorescein<br>Isothiocyanate | FITC         | Abcam              |
| Anx5           | -      | -        | phosphatidyl-<br>serine | Allophycocyanin               | APC          | BD Biosciences     |

**Supplementary Table S2.** Mediator profiles in sepsis patients with unknown and confirmed bacteremia.

| Parameter         |                         | Blood Culture negative<br>(n=69) | Blood Culture positive<br>(n=9) |
|-------------------|-------------------------|----------------------------------|---------------------------------|
| CRP               | [mg/dL]                 | 8.96 (5.67; 11.51)               | 12.94 (9.92; 20.27)             |
| PCT               | [μg/L]                  | 0.42 (0.2; 0.54)                 | 16.78 (1.61; 71.46)             |
| red blood cells   | [x 10 <sup>12</sup> /L] | 3.44 (3.24; 3.58)                | 3.02 (2.71; 3.71)               |
| white blood cells | [x 10 <sup>9</sup> /L]  | 8.6 (7.4; 10)                    | 14.4 (4.6; 18.2)                |
| monocytes         | [x 10 <sup>9</sup> /L]  | 0.63 (0.38; 0.73)                | 0.57 (0.06; 1.05)               |
| neutrophils       | [x 10 <sup>9</sup> /L]  | 8.6 (5.7; 10.7)                  | 13.6 (3.2; 14.4)                |
| lymphocytes       | [x 10 <sup>9</sup> /L]  | 1.03 (0.8; 1.19)                 | 0.51 (0.18; 1.15)               |
| NLR               | -                       | 7.33 (5.55; 11.88)               | 13.13 (4.71; 28.96)             |
| platelets         | [x 10 <sup>9</sup> /L]  | 207 (163; 221)                   | 173 (35; 300)                   |
| PF4               | [ng/mL]                 | 955 (740; 1368)                  | 344 (94.5; 2698)                |
| D-dimer           | [ng/mL]                 | 396 (368; 516)                   | 840 (471; 1492)                 |
| nucleosomes       | [AU]                    | 0.09 (0.06; 0.12)                | 0.09 (0.03; 0.21)               |
| cit H3            | [ng/mL]                 | 2.07 (1.35; 2.67)                | 2.62 (2.13; 3.72)               |
| HMGB-1            | [ng/mL]                 | 4.34 (2.86; 7.16)                | 5.09 (2.63; 9.91)               |
| C5b-9             | [μg/mL]                 | 1.38 (1.29; 1.45)                | 1.55 (0.77; 1.73)               |
| EVs               | [counts/μL]             | 176,500 (120,000; 234,500)       | 129,000 (98,500; 176,500)       |
| CD41+ EVs         | [counts/μL]             | 48,100 (25,125; 64,405)          | 39,790 (12,240; 74,130)         |
| CD41+ EVs         | [% of total EVs]        | 27 (18; 32)                      | 34 (12; 42)                     |
| CRP+ EVs          | [counts/μL]             | 83,500 (61,000; 101,500)         | 77,000 (46,000; 112,960)        |
| CRP+ EVs          | [% of total EVs]        | 55 (46; 61)                      | 60 (46; 62)                     |
| IL-1β             | [pg/mL]                 | 1.88 (1.56; 2.46)                | 2.08 (0.27; 4.44)               |
| IL-1ra            | [pg/mL]                 | 1011 (431; 1285)                 | 1552 (647; 16296)               |
| IL-2              | [pg/mL]                 | 1.7 (n.a.; n.a.)                 | 2.19 (1.7; 8.84)                |
| IL-4              | [pg/mL]                 | 3.02 (2.56; 3.44)                | 3.56 (1.6; 5.4)                 |
| IL-5              | [pg/mL]                 | 5.34 (n.a.; n.a.)                | 23.65 (5.34; 257)               |
| IL-6              | [pg/mL]                 | 26.52 (16.5; 50.04)              | 35.98 (27.64; 1752)             |
| IL-7              | [pg/mL]                 | 11.2 (4.64; 12.64)               | 8.74 (2.6; 12.64)               |
| IL-8              | [pg/mL]                 | 15.44 (12.96; 20.52)             | 20.74 (12.6; 160)               |
| IL-9              | [pg/mL]                 | 386 (358; 402)                   | 408 (124; 467)                  |
| IL-10             | [pg/mL]                 | 2.84 (1.32; 2.92)                | 2.5 (0.81; 65.84)               |
| IL-12             | [pg/mL]                 | 1.87 (n.a.; n.a.)                | 2.96 (0.81; 12.24)              |
| IL-13             | [pg/mL]                 | 2.42 (2.08; 2.76)                | 1.16 (0.36; 5.4)                |
| IL-15             | [pg/mL]                 | 18.02 (n.a.; n.a.)               | 18.02 (n.a.; n.a.)              |
| IL-17             | [pg/mL]                 | 2.67 (n.a.; n.a.)                | 10.96 (2.67; 28.48)             |
| IFN-γ             | [pg/mL]                 | 5.32 (4.68; 6.2)                 | 11.9 (6.12; 54.4)               |
| TNF-α             | [pg/mL]                 | 74.76 (66.24; 84.64)             | 108 (86.88; 233)                |
| eotaxin           | [pg/mL]                 | 48.66 (39.48; 55.44)             | 49.26 (24.24; 72)               |
| IP-10             | [pg/mL]                 | 1344 (817; 2434)                 | 690 (614; 7106)                 |
| MCP-1             | [pg/mL]                 | 37.72 (27.34; 46.92)             | 42.3 (22.36; 448)               |
| MIP-1α            | [pg/mL]                 | 4.52 (3.52; 6.24)                | 10.42 (5.08; 26.92)             |
| MIP-1β            | [pg/mL]                 | 205 (189; 219)                   | 224 (67.96; 347)                |
| RANTES            | [pg/mL]                 | 4360 (3135; 5281)                | 2778 (529; 6211)                |
| FGF               | [pg/mL]                 | 26.48 (20; 29.28)                | 30.82 (26.24; 62.44)            |
| G-CSF             | [pg/mL]                 | 165 (123; 216)                   | 376 (214; 1492)                 |
| GM-CSF            | [pg/mL]                 | 0.44 (n.a.; n.a.)                | 0.44 (n.a.; n.a.)               |
| PDGF-bb           | [pg/mL]                 | 391 (248; 554)                   | 204 (2.46; 621)                 |
| VEGF              | [pg/mL]                 | 4.22 (n.a.; n.a.)                | 4.22 (n.a.; n.a.)               |

Data are represented as median (lower; upper confidence interval). n.a., not applicable as confidence intervals could not be calculated due to low variations.

**Supplementary Table S3.** Inflammatory mediator profiles in survivors and non-survivors.

| Parameter             |                         | Survivors                  | Non-Survivors             |
|-----------------------|-------------------------|----------------------------|---------------------------|
| CRP                   | [mg/dL]                 | 9.7 (5.98; 12.08)          | 9.92 (5.67; 16.19)        |
| PCT                   | [μg/L]                  | 0.44 (0.22; 0.75)          | 2.06 (0.48; 12.32)        |
| red blood cells       | [x 10 <sup>12</sup> /L] | 3.5 (3.22; 3.61)           | 3.29 (2.85; 3.36)         |
| white blood cells     | [x 10 <sup>9</sup> /L]  | 9 (7.5; 12.1)              | 8.6 (4.4; 9.7)            |
| monocytes             | [x 10 <sup>9</sup> /L]  | 0.68 (0.53; 0.76)          | 0.36 (0.22; 0.72)         |
| neutrophils           | [x 10 <sup>9</sup> /L]  | 10.25 (5.7; 11.2)          | 8 (3.75; 12.5)            |
| lymphocytes           | [x 10 <sup>9</sup> /L]  | 1.02 (0.72; 1.16)          | 1.02 (0.4; 1.39)          |
| NLR                   | -                       | 7.33 (5.57; 13.15)         | 11.87 (0.99; 31.96)       |
| platelets             | [x 10 <sup>9</sup> /L]  | 211 (163; 232)             | 168 (27; 212)             |
| PF4                   | [ng/mL]                 | 901 (732; 1463)            | 791 (260; 1618)           |
| D-dimer               | [ng/mL]                 | 459 (373; 596)             | 401 (278; 541)            |
| nucleosomes           | [AU]                    | 0.09 (0.05; 0.11)          | 0.11 (0.05; 0.2)          |
| cit H3                | [ng/mL]                 | 2.1 (1.6; 2.73)            | 2.64 (1.32; 3.39)         |
| HMGB-1                | [ng/mL]                 | 3.86 (2.86; 7.27)          | 4.58 (2.1; 10.17)         |
| C5b-9                 | [μg/mL]                 | 1.35 (1.25; 1.45)          | 1.47 (1.09; 1.63)         |
| EVs                   | [counts/μL]             | 185,000 (117,500; 236,500) | 126,500 (82,000; 148,000) |
| CD41 <sup>+</sup> EVs | [counts/μL]             | 48,100 (25,125; 69,625)    | 31,980 (11,880; 54,360)   |
| CD41 <sup>+</sup> EVs | [% of total EVs]        | 28 (21; 34)                | 23 (17; 34)               |
| CRP <sup>+</sup> EVs  | [counts/μL]             | 85,000 (61,000; 104,500)   | 79,500 (48,000; 88,500)   |
| CRP <sup>+</sup> EVs  | [% of total EVs]        | 55 (46; 60)                | 63 (45; 67)               |
| IL-1β                 | [pg/mL]                 | 1.88 (1.28; 1.88)          | 2.66 (0.84; 3.16)         |
| IL-1ra                | [pg/mL]                 | 1044 (623; 1353)           | 1449 (10.76; 4599)        |
| IL-2                  | [pg/mL]                 | 1.7 (n.a.; n.a.)           | 1.73 (1.7; 6.68)          |
| IL-4                  | [pg/mL]                 | 3.08 (2.48; 3.28)          | 2.48 (1.84; 2.96)         |
| IL-5                  | [pg/mL]                 | 5.34 (n.a.; n.a.)          | 5.34 (n.a.; n.a.)         |
| IL-6                  | [pg/mL]                 | 27.16 (17.68; 38.68)       | 66.62 (23.66; 126)        |
| IL-7                  | [pg/mL]                 | 11.2 (4.64; 12.64)         | 6.72 (4.64; 15.46)        |
| IL-8                  | [pg/mL]                 | 15.44 (13.56; 21.84)       | 21.18 (13.06; 34.22)      |
| IL-9                  | [pg/mL]                 | 387 (360; 413)             | 370 (288; 423)            |
| IL-10                 | [pg/mL]                 | 2.62 (1.58; 3.68)          | 3.96 (1.84; 7.24)         |
| IL-12                 | [pg/mL]                 | 1.87 (n.a.; n.a.)          | 2.09 (1.87; 2.96)         |
| IL-13                 | [pg/mL]                 | 2.4 (1.32; 2.76)           | 2.58 (2.08; 4.28)         |
| IL-15                 | [pg/mL]                 | 18.02 (n.a.; n.a.)         | 18.02 (n.a.; n.a.)        |
| IL-17                 | [pg/mL]                 | 2.67 (n.a.; n.a.)          | 2.67 (2.67; 10.16)        |
| IFN-γ                 | [pg/mL]                 | 5.88 (4.6; 6.2)            | 5.62 (4.84; 10.52)        |
| TNF-α                 | [pg/mL]                 | 78.4 (68.44; 92.48)        | 93.62 (52.76; 119)        |
| eotaxin               | [pg/mL]                 | 47.2 (38.4; 55.44)         | 49.38 (25.4; 60.18)       |
| IP-10                 | [pg/mL]                 | 978 (658; 1721)            | 5639 (655; 9819)          |
| MCP-1                 | [pg/mL]                 | 35.06 (26.12; 46.4)        | 74.2 (27.48; 114)         |
| MIP-1α                | [pg/mL]                 | 4.88 (3.64; 6.36)          | 6.34 (3.08; 30.12)        |
| MIP-1β                | [pg/mL]                 | 209 (188; 221)             | 197 (165; 256)            |
| RANTES                | [pg/mL]                 | 4527 (3081; 5281)          | 3117 (1586; 9006)         |
| FGF                   | [pg/mL]                 | 26.48 (20; 29.68)          | 27.88 (9.44; 29.32)       |
| G-CSF                 | [pg/mL]                 | 192 (134; 237)             | 192 (128; 893)            |
| GM-CSF                | [pg/mL]                 | 0.44 (n.a.; n.a.)          | 0.44 (n.a.; n.a.)         |
| PDGF-bb               | [pg/mL]                 | 401 (254; 565)             | 237 (35.32; 688)          |
| VEGF                  | [pg/mL]                 | 4.22 (n.a.; n.a.)          | 4.22 (n.a.; n.a.)         |

Data are represented as median (lower; upper confidence interval). n.a., not applicable as confidence intervals could not be calculated due to low variations.

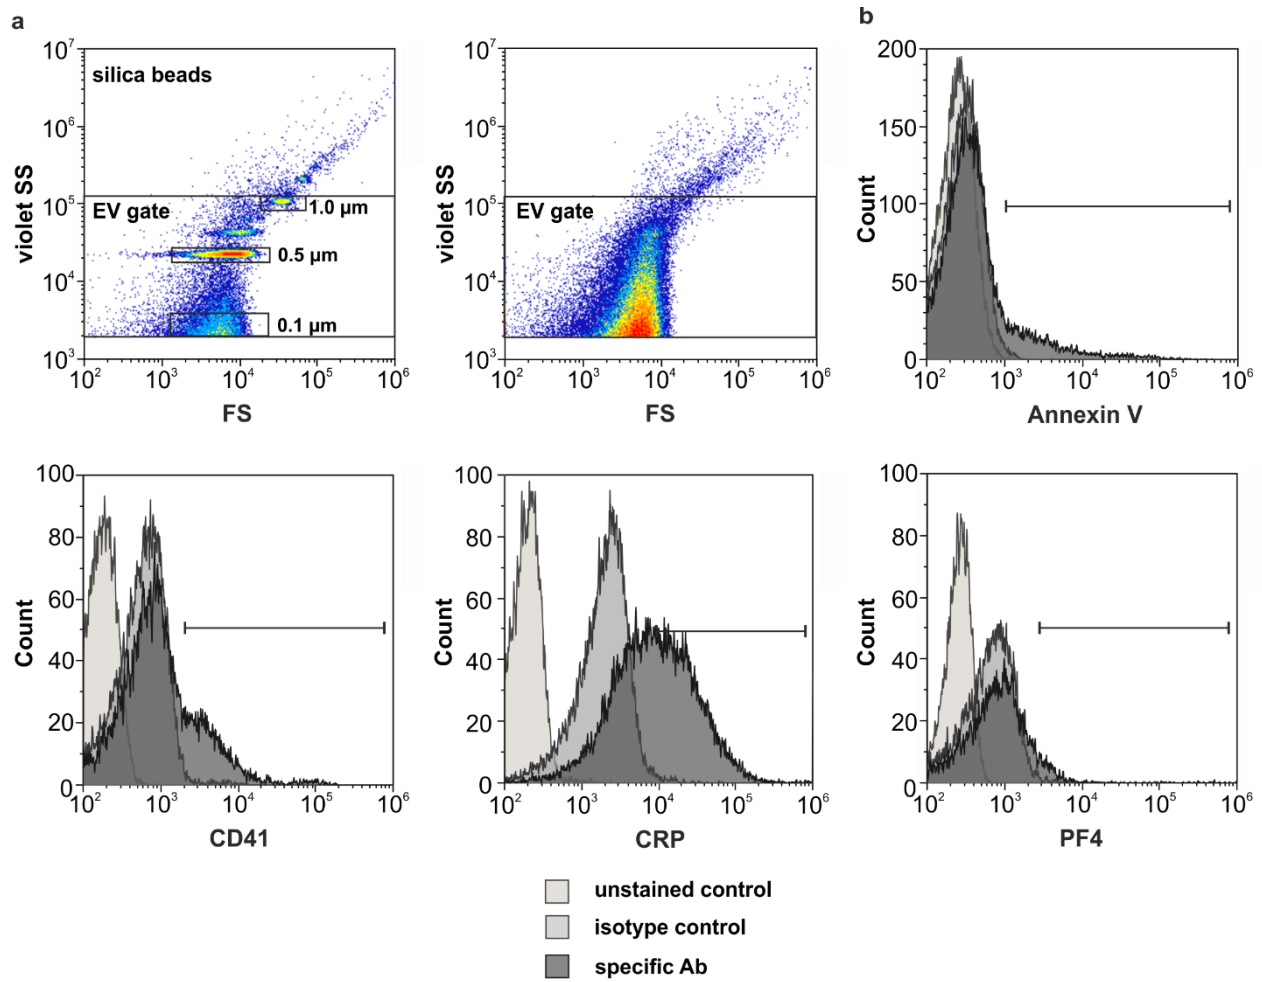

**Supplementary Figure S1.** Calibration and controls for the flow cytometric characterization of extracellular vesicles. (a) Flow cytometric characterization was performed on a CytoFLEX LX flow cytometer (Beckman Coulter) after calibration with fluorescent silica particles (0.1, 0.5, and 1.0  $\mu\text{m}$ ), and the EV gate was set below the 1  $\mu\text{m}$  bead cloud as described in the Methods section (left panel). Staining of EVs was performed as described in the methods section and a representative forward scatter *vs.* violet side scatter (FS *vs.* violet SS) density plot (right panel) is shown. (b) The respective unstained controls, isotype controls, and single stainings are shown. Annexin V staining in PBS without  $\text{Ca}^{++}$  and  $\text{Mg}^{++}$  was used as negative control. Bars indicate positive expression.

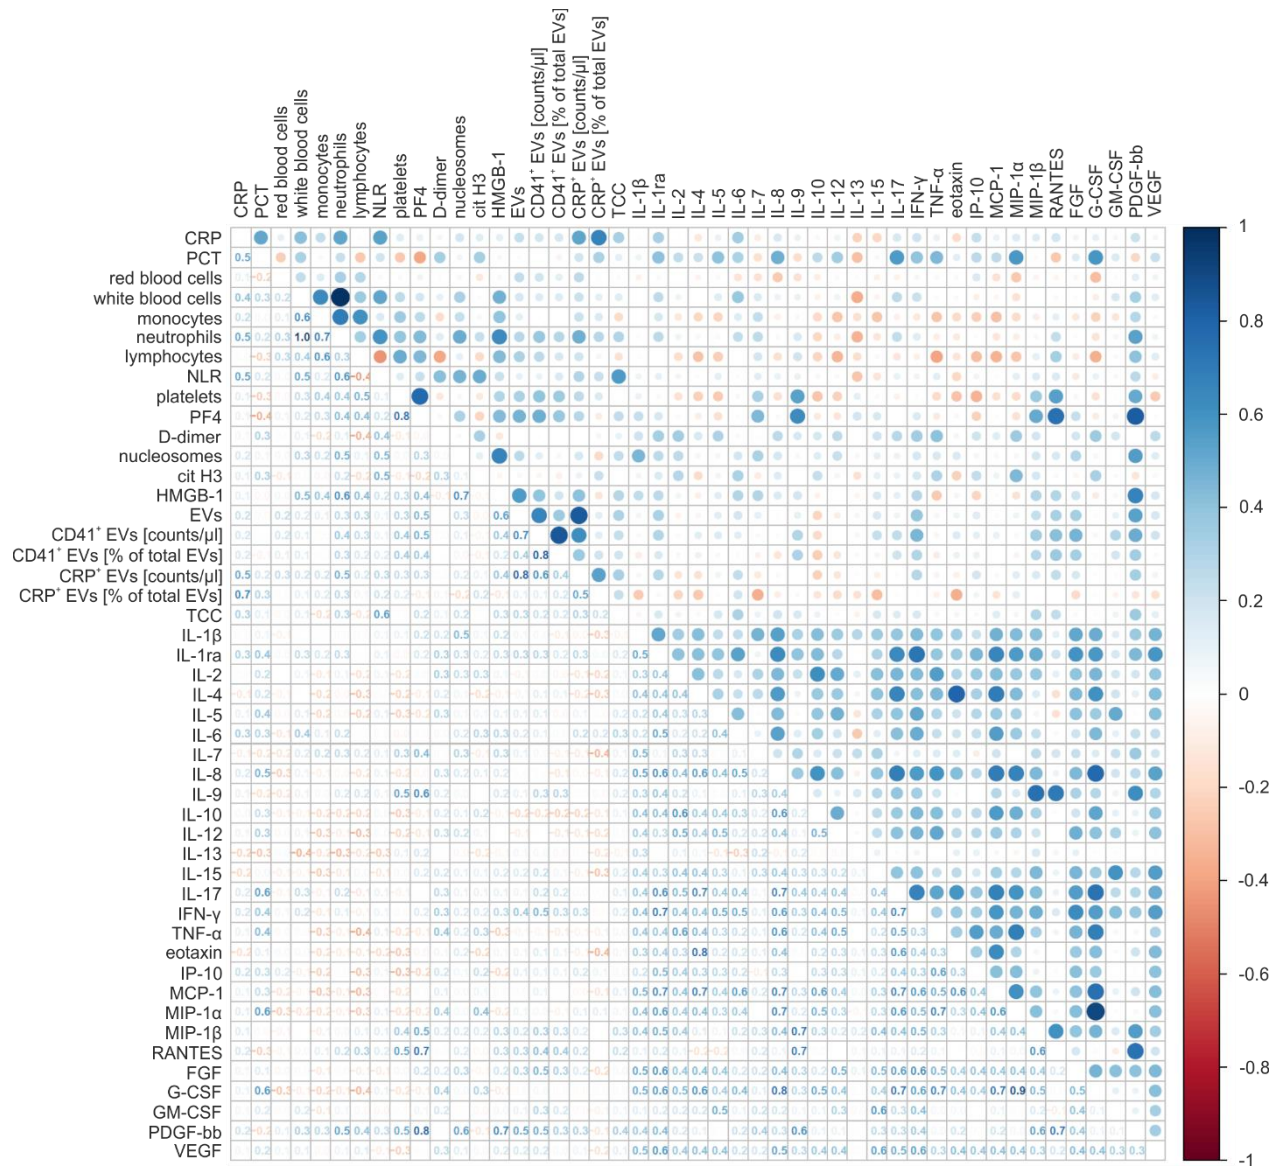

**Supplementary Figure S2.** Spearman-based correlation plot of all inflammatory mediators analyzed in COVID-19 negative sepsis patients. The colour and size of the dots represent the level of correlation coefficient.

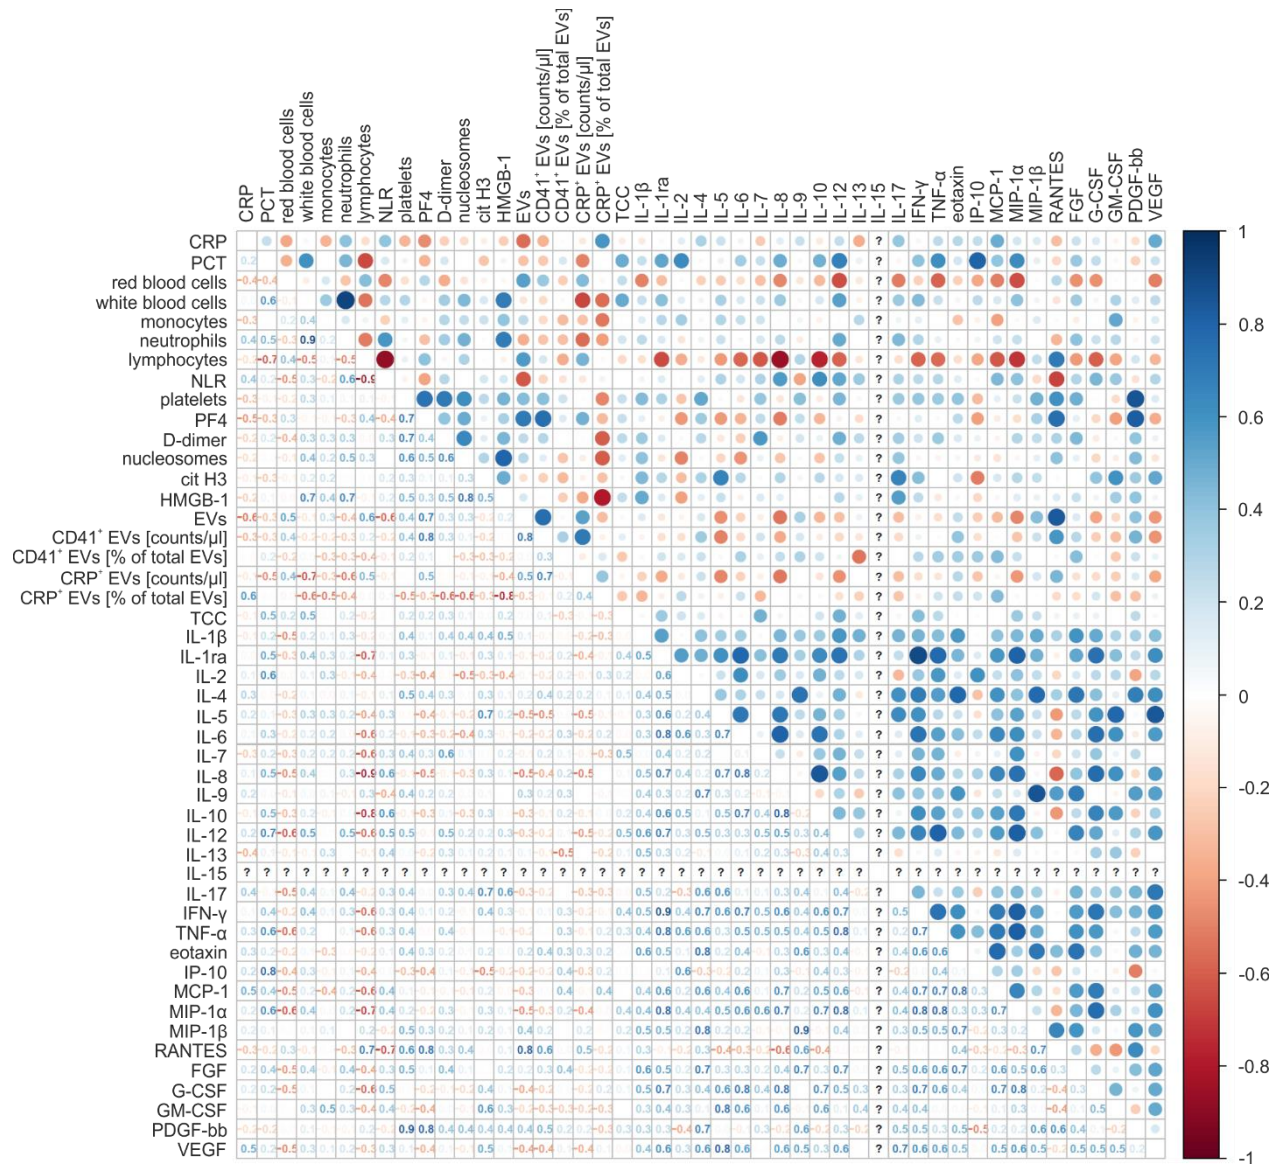

**Supplementary Figure S3.** Spearman-based correlation plot of all inflammatory mediators analyzed in COVID-19 positive sepsis patients. The colour and size of the dots represent the level of correlation coefficient. For IL-15 correlations could not be calculated due to low variations.
